# Supplementary material
Source: PubMed Central journal article supplement (PMC3675449)

**Supplemental Table 1**

**SALL4 expression in normal bone marrow and chronic myeloid leukemia (CML)**

| <b>CML and Normal Bone Marrow</b> |                         | <b>No. of SALL4-positive Cases Per Total No. of Cases Examined (percentage)<sup>b</sup></b> |
|-----------------------------------|-------------------------|---------------------------------------------------------------------------------------------|
| <b>Samples</b>                    | <b>Detection Method</b> |                                                                                             |
| Chronic phase CML                 | IHC                     | 0/11                                                                                        |
| Accelerated phase CML             | IHC                     | 1/6                                                                                         |
| Blast crisis CML                  | IHC                     | 9/12                                                                                        |
| Chronic phase CML                 | FACS                    | 0/3                                                                                         |
| Blast crisis CML                  | FACS                    | 5/5                                                                                         |
| Blast crisis CML                  | qRT-PCR                 | 3/3                                                                                         |
| Total                             |                         | 18/43 (42.5%)                                                                               |
| Normal bone marrow                | FACS                    | 0/3                                                                                         |

<sup>a</sup>qRT-PCR = quantitate reverse transcriptase polymerase chain reactive; IHC = immunohistochemistry, FACS = fluorescence-activated cell sorting

<sup>b</sup>Criteria for positive expression of SALL4 were the presence of only nuclear staining of neoplastic cells and staining of >15% of cells. Criteria for negative expression of SALL4 were the presence of nuclear staining of cells and staining of <2%

**Supplemental Table 2**

**Complete Blood Count from the recipients**

|                                 | <b>WT (n=6)</b>     | <b>TG (n=10)</b>    | <b>BL6 (n=3)</b>     |
|---------------------------------|---------------------|---------------------|----------------------|
| <b>WBC (x10<sup>3</sup>/ul)</b> | <b>82.3±45.4</b>    | <b>118.9 ±88.0</b>  | <b>7.7 ±6.7</b>      |
| <b>RBC (x10<sup>6</sup>/ul)</b> | <b>10.2 ±1.3</b>    | <b>9.6 ±1.7</b>     | <b>8.7 ±1.4</b>      |
| <b>PLT (x10<sup>3</sup>/ul)</b> | <b>371.7 ±139.7</b> | <b>610.8 ±422.6</b> | <b>1311.7 ±493.9</b> |

## Figure Legends

**Supplemental Figure 1** Recipients of BCR-ABL induced SALL4B transgenic and wild-type bone marrow cells develop CML-like leukemia. All leukemic mice showed visibly pale marrow and splenomegaly compared with normal, healthy controls. Flow cytometry analysis demonstrated that 80% of BCR-ABL-positive bone marrow cells from both groups were Mac1+ and Gr-1+ neutrophils. FACS staining profile of whole bone marrow (A), BCR-ABL-positive bone marrow (B) and BCR-ABL positive spleen (C) cells from leukemic mice. (WT: n=4, SALL4B transgenic: n=9). BCR-ABL transduced cells were identified by GFP positivity and showed on X-axis.

### Supplemental Figure 1

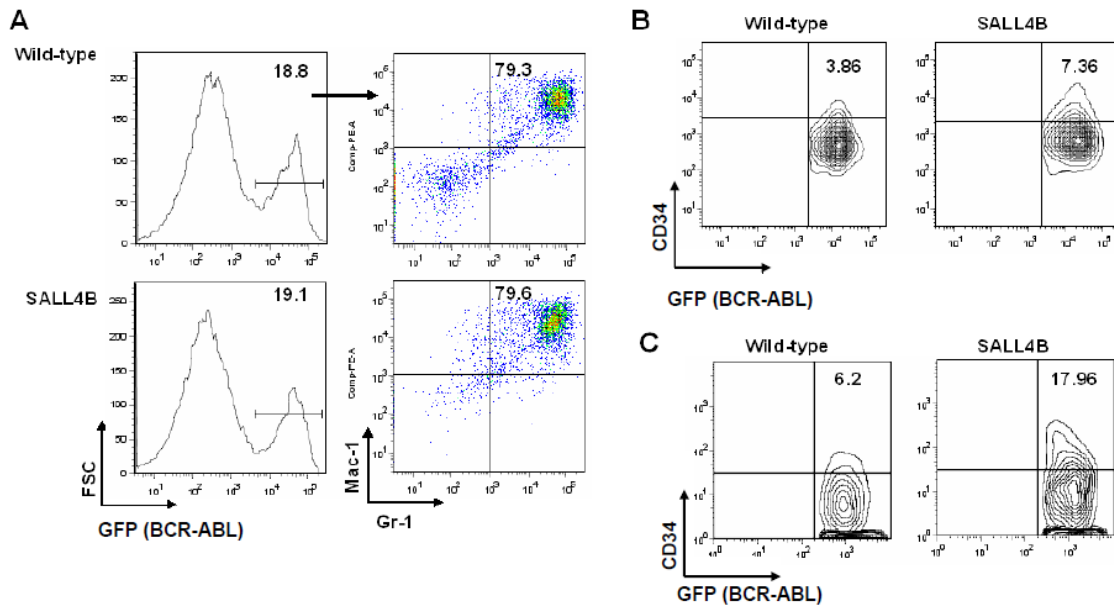

Supplement: NIHMS461502-supplement-Supplementary_data.pdf [file NIHMS461502-supplement-Supplementary_data.pdf]
